# Supplementary material for: Patient-Reported Outcomes of Palbociclib Plus Exemestane with GnRH Agonist versus Capecitabine in Premenopausal Women with Hormone Receptor-Positive Metastatic Breast Cancer: A Prospective, Open-Label, Randomized Phase ll Trial (KCSG-BR 15-10)
Source: PubMed Central journal article supplement (PMC7694364; doi:10.3390/cancers12113265), 2020-11-05
Supplement: cancers-12-03265-s001.pdf [file cancers-12-03265-s001.pdf]

## Supplementary Materials:

# Patient-Reported Outcomes of Palbociclib Plus Exemestane with GnRH Agonist versus Capecitabine in Premenopausal Women with Hormone Receptor-Positive Metastatic Breast Cancer: A Prospective, Open-Label, Randomized Phase II Trial (KCSG-BR 15-10)

Soohyeon Lee, Seock-Ah Im, Gun Min Kim, Kyung Hae Jung, Seok Yun Kang, In Hae Park, Jee Hyun Kim, Kyoung Eun Lee, Hee Kyung Ahn, Moon Hee Lee, Hee-Jun Kim, Han Jo Kim, Jong In Lee, Su-Jin Koh, Yeon Hee Park and Korean Cancer Study Group (KCSG)

**Table S1.** Baseline characteristics between palbociclib plus exemestane with GnRH agonist and capecitabine arm.

|                                                                                                  | Palbociclib plus<br>Endocrine therapy<br>( <i>n</i> = 92) | Capecitabine<br>( <i>n</i> = 86) |
|--------------------------------------------------------------------------------------------------|-----------------------------------------------------------|----------------------------------|
| Age in years; median (range)                                                                     | 44 (31–58)                                                | 44 (28–53)                       |
| BMI; median (range)                                                                              | 22 (15–30)                                                | 22 (14–35)                       |
| Hormone receptor status                                                                          |                                                           |                                  |
| ER+/PR+                                                                                          | 70 (76.1%)                                                | 64 (74.4%)                       |
| ER+/PR–                                                                                          | 22 (23.9%)                                                | 22 (25.6%)                       |
| ECOG performance status                                                                          |                                                           |                                  |
| 0                                                                                                | 54 (58.7%)                                                | 48 (55.8%)                       |
| 1–2                                                                                              | 38 (41.3%)                                                | 38 (44.2%)                       |
| Metastatic sites                                                                                 |                                                           |                                  |
| Bone only                                                                                        | 22 (23.9%)                                                | 18 (20.9%)                       |
| Visceral organs                                                                                  | 45 (48.9%)                                                | 43 (50.0%)                       |
| lung                                                                                             | 29 (31.5%)                                                | 22 (25.6%)                       |
| Liver                                                                                            | 17 (18.5%)                                                | 19 (22.1%)                       |
| DFS from the 1st diagnosis of stage I–III BC ( <i>N</i> = 124)                                   | <i>N</i> = 64                                             | <i>N</i> = 60                    |
| <24 months                                                                                       | 12 (13.0%)                                                | 15 (17.4%)                       |
| ≥24 months                                                                                       | 52 (56.5%)                                                | 45 (52.3%)                       |
| Initially stage IV                                                                               | 28 (30.4%)                                                | 26 (30.2%)                       |
| Tamoxifen resistance (including recurrence within 1 year after completion of adjuvant tamoxifen) |                                                           |                                  |
| Yes                                                                                              | 76 (82.6%)                                                | 77 (89.5%)                       |
| No                                                                                               | 16 (17.4%)                                                | 9 (10.5%)                        |
| Prior cytotoxic chemotherapy for MBC                                                             |                                                           |                                  |
| Yes                                                                                              | 22 (23.9%)                                                | 18 (20.9%)                       |
| No                                                                                               | 70 (76.1%)                                                | 68 (79.1%)                       |
| Previous lines of treatment for MBC                                                              |                                                           |                                  |
| 0                                                                                                | 46 (50.0%)                                                | 45(51.2%)                        |
| 1                                                                                                | 30 (32.6%)                                                | 30(52.3%)                        |
| 2                                                                                                | 16 (17.4%)                                                | 11 (12.8%)                       |

| Prior (neo)adjuvant treatment (N = 124) | N = 64     | N = 60     |
|-----------------------------------------|------------|------------|
| Cytotoxic chemotherapy                  | 58 (90.1%) | 50 (83.3%) |
| Anthracycline based                     | 16 (25.0%) | 11 (18.3%) |
| Anthracycline and taxane based          | 40 (62.5%) | 36 (60.0%) |
| Others                                  | 2 (3.1%)   | 3 (5.0%)   |
| Endocrine treatment                     | 60 (93.8%) | 55 (91.7%) |
| Tamoxifen                               | 43 (67.2%) | 47 (78.3%) |
| Tamoxifen + GnRH agonist                | 17 (26.6%) | 8 (13.3%)  |

BMI = body mass index; ER = estrogen receptor; PR = progesterone receptor; DFS = disease free survival; BC = breast cancer; MBC = metastatic breast cancer.

**Table S2.** Comparison between two treatment arms of change pattern according to time of each subscale scores by analysis using generalized estimating equations.

|                       | Parameter      | Level1       | Estimate | Standard Error | p value |
|-----------------------|----------------|--------------|----------|----------------|---------|
| Global health status  | ARMCD          | ArmA vs ArmB | 5.3442   | 2.9061         | 0.0659  |
|                       | week_i         |              | 0.0064   | 0.0565         | 0.9100  |
|                       | week_i × ARMCD | ArmA vs ArmB | -0.0333  | 0.0678         | 0.6230  |
| Physical functioning  | ARMCD          | ArmA vs ArmB | 3.6421   | 2.7033         | 0.1779  |
|                       | week_i         |              | 0.0225   | 0.0474         | 0.6353  |
|                       | week_i × ARMCD | ArmA vs ArmB | 0.0095   | 0.0549         | 0.8619  |
| Role functioning      | ARMCD          | ArmA vs ArmB | 5.8515   | 3.5271         | 0.0971  |
|                       | week_i         |              | -0.0189  | 0.0598         | 0.7524  |
|                       | week_i × ARMCD | ArmA vs ArmB | 0.0028   | 0.0696         | 0.9675  |
| Emotional functioning | ARMCD          | ArmA vs ArmB | 1.3662   | 2.6889         | 0.6114  |
|                       | week_i         |              | -0.0707  | 0.073          | 0.3332  |
|                       | week_i × ARMCD | ArmA vs ArmB | 0.0775   | 0.0813         | 0.3405  |
| Cognitive functioning | ARMCD          | ArmA vs ArmB | 2.593    | 2.4358         | 0.2871  |
|                       | week_i         |              | 0.0234   | 0.0501         | 0.6412  |
|                       | week_i × ARMCD | ArmA vs ArmB | -0.0769  | 0.0601         | 0.2010  |
| Social functioning    | ARMCD          | ArmA vs ArmB | 7.199    | 3.3151         | 0.0299  |
|                       | week_i         |              | -0.0246  | 0.0743         | 0.7409  |
|                       | week_i × ARMCD | ArmA vs ArmB | 0.0068   | 0.0901         | 0.9396  |
| Fatigue               | ARMCD          | ArmA vs ArmB | -3.2795  | 3.0029         | 0.2748  |
|                       | week_i         |              | 0.0595   | 0.0633         | 0.3471  |
|                       | week_i × ARMCD | ArmA vs ArmB | -0.0569  | 0.0709         | 0.4222  |
| Nausea and vomiting   | ARMCD          | ArmA vs ArmB | -7.081   | 2.1759         | 0.0011  |
|                       | week_i         |              | -0.0745  | 0.0405         | 0.0660  |
|                       | week_i × ARMCD | ArmA vs ArmB | 0.0695   | 0.0482         | 0.1493  |
| Pain                  | ARMCD          | ArmA vs ArmB | -6.8937  | 3.3473         | 0.0394  |
|                       | week_i         |              | -0.1107  | 0.0525         | 0.0349  |
|                       | week_i × ARMCD | ArmA vs ArmB | 0.0804   | 0.0658         | 0.2215  |
| Dyspnea               | ARMCD          | ArmA vs ArmB | -0.8068  | 2.9748         | 0.7862  |
|                       | week_i         |              | -0.0292  | 0.0498         | 0.5573  |
|                       | week_i × ARMCD | ArmA vs ArmB | -0.0126  | 0.0637         | 0.8430  |
| Insomnia              | ARMCD          | ArmA vs ArmB | 4.102    | 3.8952         | 0.2923  |
|                       | week_i         |              | 0.0937   | 0.072          | 0.1933  |
|                       | week_i × ARMCD | ArmA vs ArmB | -0.0626  | 0.0866         | 0.4702  |

|               |                |              |         |        |        |
|---------------|----------------|--------------|---------|--------|--------|
| Appetite loss | ARMCD          | ArmA vs ArmB | -4.7466 | 3.0746 | 0.1226 |
|               | week_i         |              | -0.0667 | 0.0544 | 0.2204 |
|               | week_i × ARMCD | ArmA vs ArmB | -0.0155 | 0.0647 | 0.8112 |
| Constipation  | ARMCD          | ArmA vs ArmB | -1.3192 | 2.9857 | 0.6586 |
|               | week_i         |              | -0.0357 | 0.0546 | 0.5131 |
|               | week_i × ARMCD | ArmA vs ArmB | 0.0438  | 0.0692 | 0.5261 |
| Diarrhea      | ARMCD          | ArmA vs ArmB | -8.3505 | 2.1837 | 0.0001 |
|               | week_i         |              | 0.1238  | 0.0547 | 0.0237 |
|               | week_i × ARMCD | ArmA vs ArmB | -0.1153 | 0.0635 | 0.0696 |
| Total Score   | ARMCD          | ArmA vs ArmB | 3.7713  | 2.1344 | 0.0772 |
|               | week_i         |              | -0.0022 | 0.039  | 0.9553 |
|               | week_i × ARMCD | ArmA vs ArmB | 0.0068  | 0.0455 | 0.8806 |

ARMCD = planned arm code.
